# Supplementary material for: Facile electron delivery from graphene template to ultrathin metal-organic layers for boosting CO2 photoreduction
Source: PubMed Central journal article supplement (PMC7864970; doi:10.1038/s41467-021-21084-9), 2021-02-05
Supplement: 41467_2021_21084_MOESM1_ESM.pdf [file 41467_2021_21084_MOESM1_ESM.pdf]

## **Supplementary Information**

**Jia-Wei Wang et al.**

## Supplementary Figures

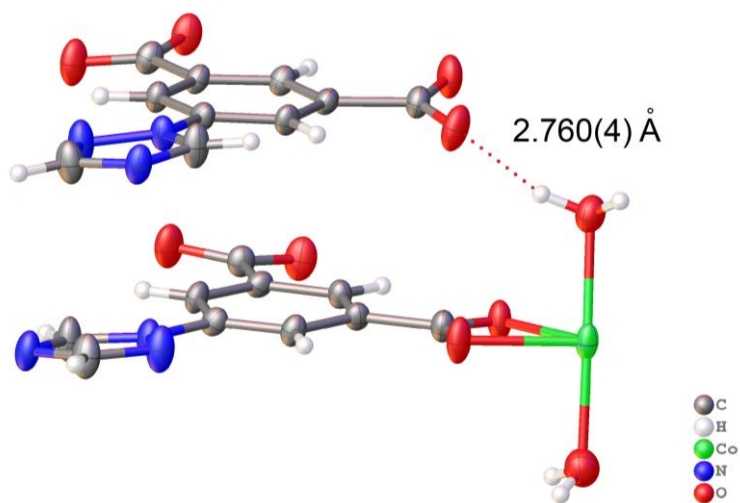

**Supplementary Figure 1 | H-bonding mode.** Schematic presentation of the H-bonding between two layers of Co-MOF.

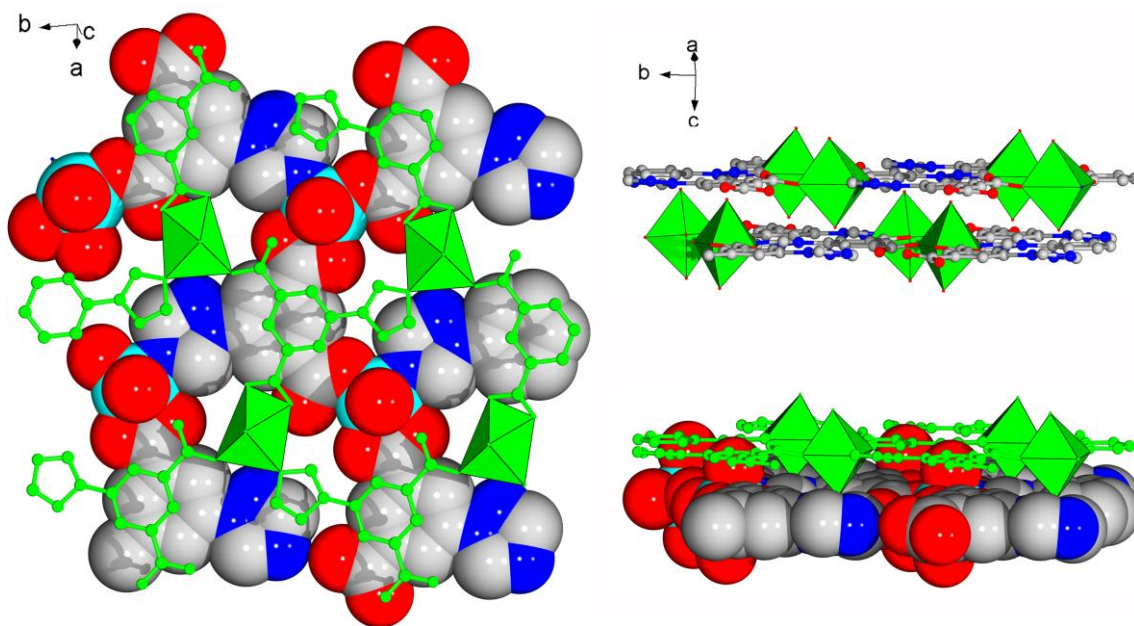

**Supplementary Figure 2 | Crystallographic structure of Co-MOF.** Presentation of crystallographic 3D structure of Co-MOF, stacked by the 2D metal-organic layers. The H atoms are omitted for clarity.

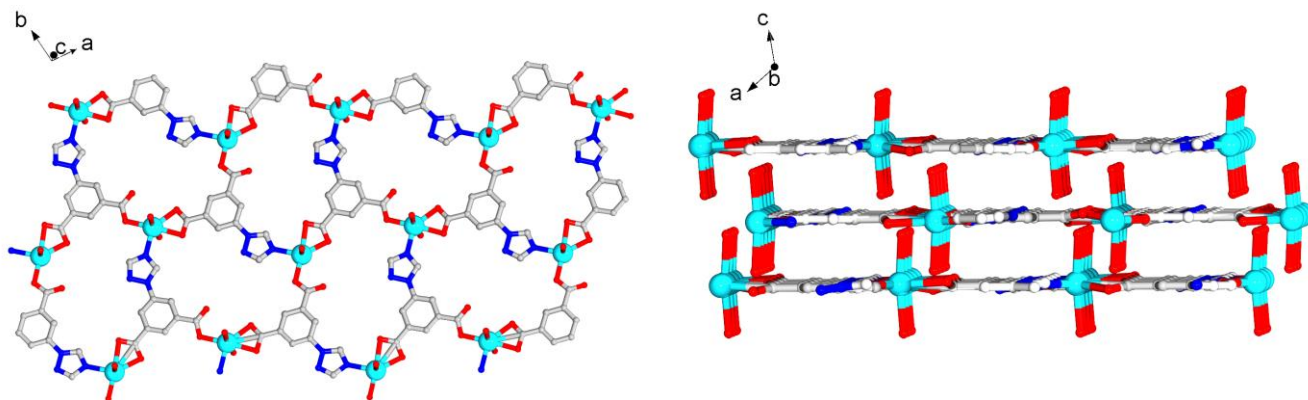

**Supplementary Figure 3 | Crystallographic structure of Cd-MOF.** Presentation of crystallographic 3D structure of Cd-MOF, stacked by the 2D metal-organic layers. The H atoms are omitted for clarity.

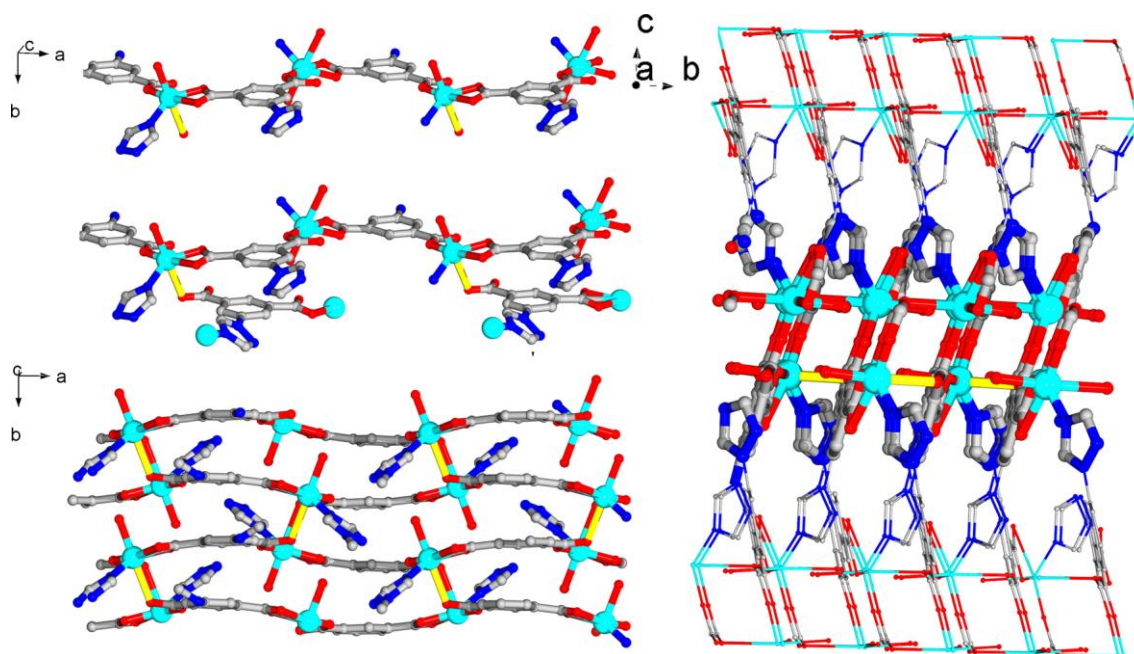

**Supplementary Figure 4 | Crystallographic structure of Zn-MOF.** Presentation of crystallographic 3D structure of Zn-MOF. The H atoms are omitted for clarity.

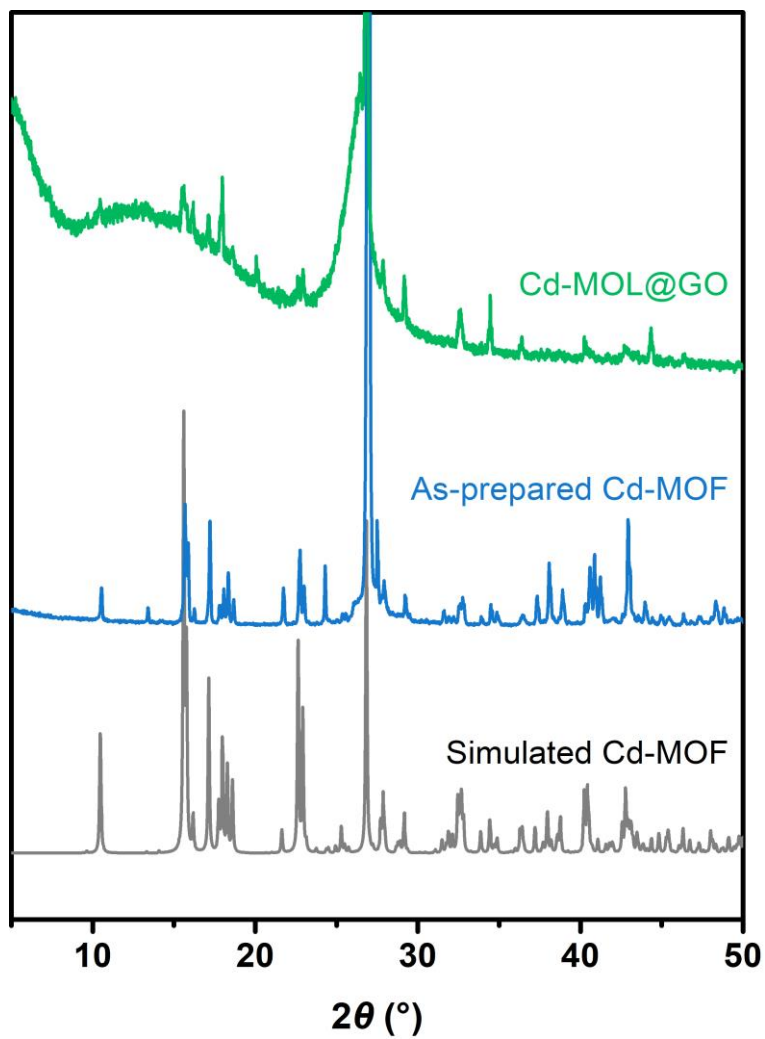

**Supplementary Figure 5 | PXRD patterns for Cd-based samples.** Simulated Cd-MOF (gray), as-prepared Cd-MOF (blue) and Cd-MOL@GO (green).

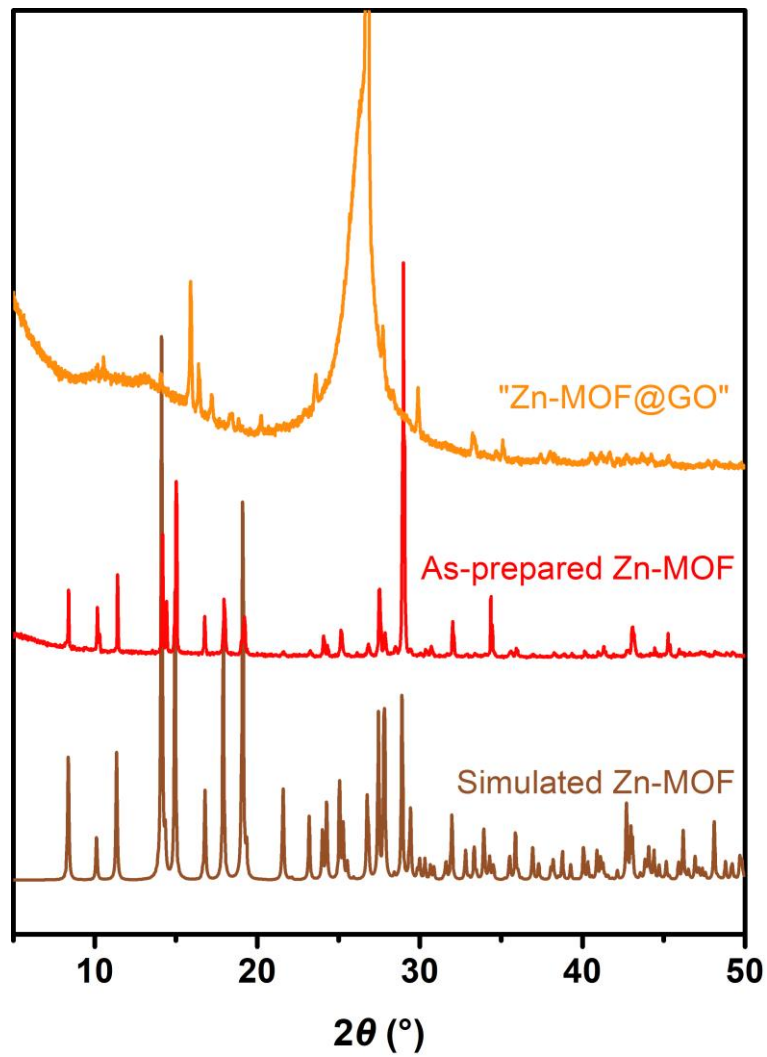

**Supplementary Figure 6 | PXRD patterns for Zn-based samples.** Simulated Zn-MOF (brown), as-prepared Zn-MOF (red), envisioned “Zn-MOF@GO” sample (orange).



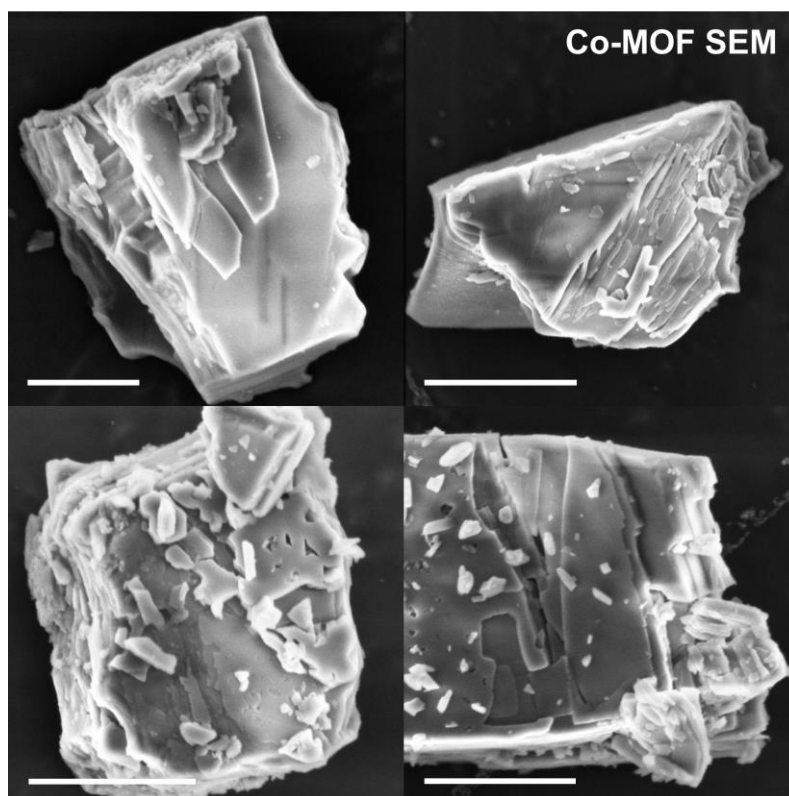

**Supplementary Figure 7 | SEM.** SEM images of bulky Co-MOF with the bar of 1  $\mu\text{m}$ .

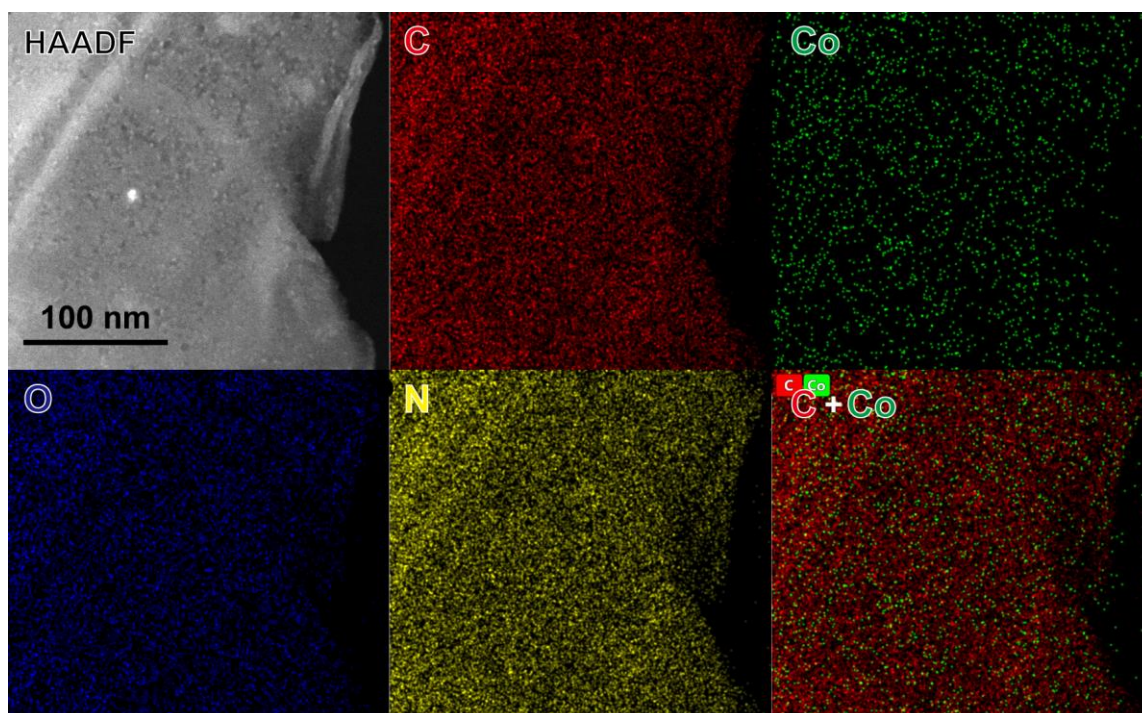

**Supplementary Figure 8 | EDS mapping.** EDS mapping of Co-MOL@GO, indicating the presence of Co and N elements on the GO.

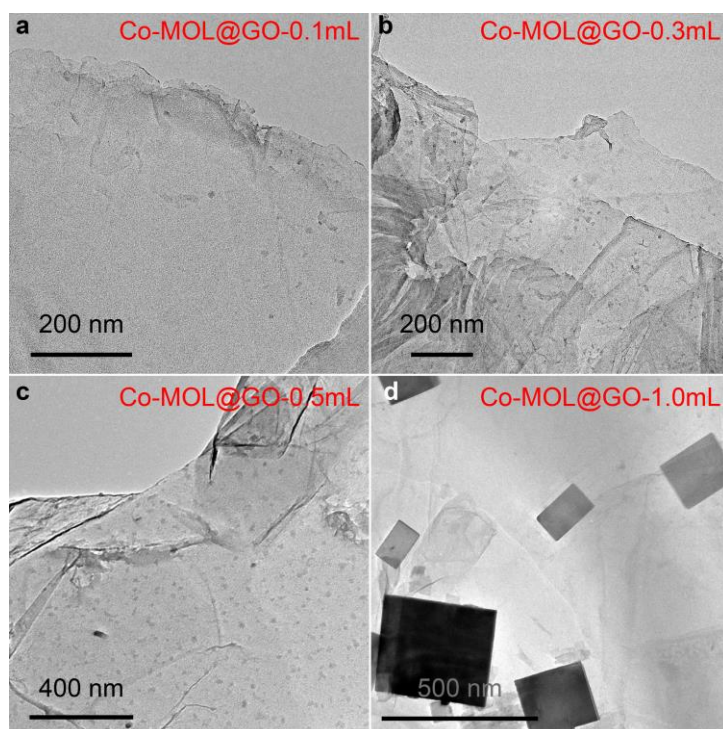

**Supplementary Figure 9 | TEM for Co-MOL@GO with different loading amounts.** TEM images for the Co-MOL@GO samples prepared with different loading amounts of  $\text{Co}^{2+}$ , including **a** 0.1, **b** 0.3, **c** 0.5 and **d** 1.0 mL aqueous solution of  $\text{CoCl}_2 \cdot 6\text{H}_2\text{O}$  (0.1 M).

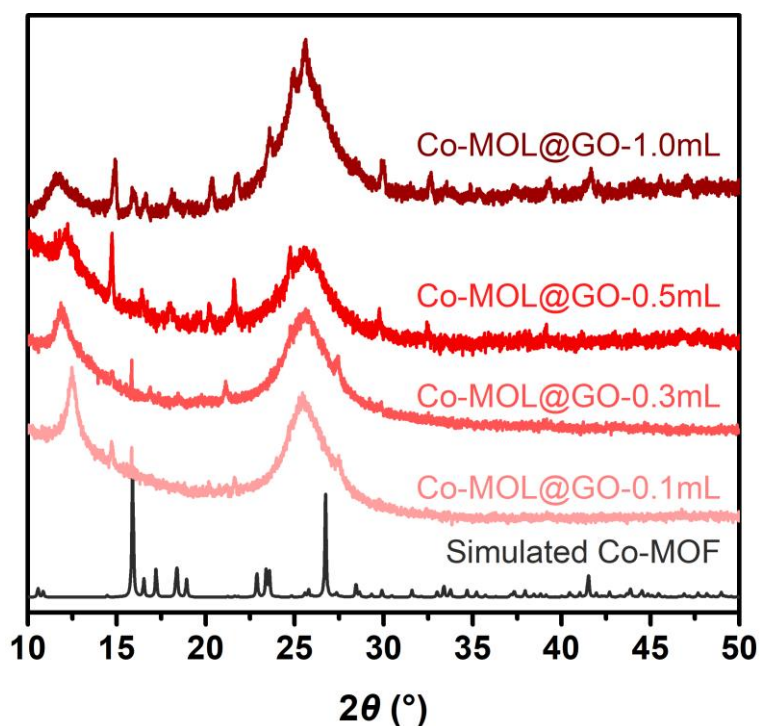

**Supplementary Figure 10 | PXRD results for Co-MOL@GO with different loading amounts of  $\text{Co}^{2+}$ .** PXRD patterns of the Co-MOL@GO samples prepared with 0.1, 0.3, 0.5 or 1.0 mL aqueous solution of  $\text{CoCl}_2 \cdot 6\text{H}_2\text{O}$  (0.1 M). The simulated PXRD pattern of Co-MOF is shown for comparison.



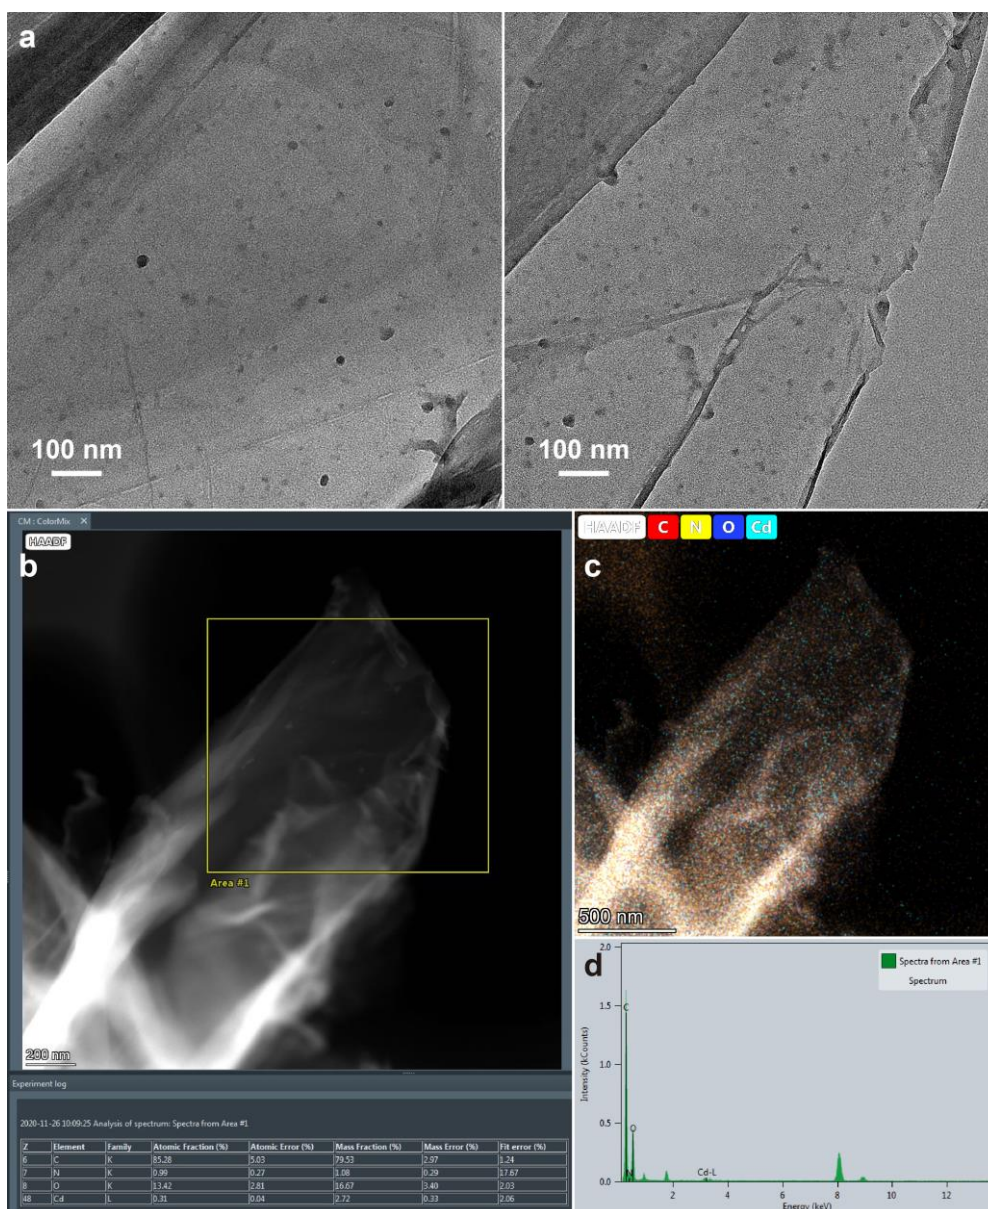

**Supplementary Figure 11 | TEM and EDX characterizations on Cd-MOL@GO. a** TEM images of Cd-MOL@GO, showing a range of MOL diameter of 20-30 nm. **b-d** EDX results of Cd-MOL@GO.



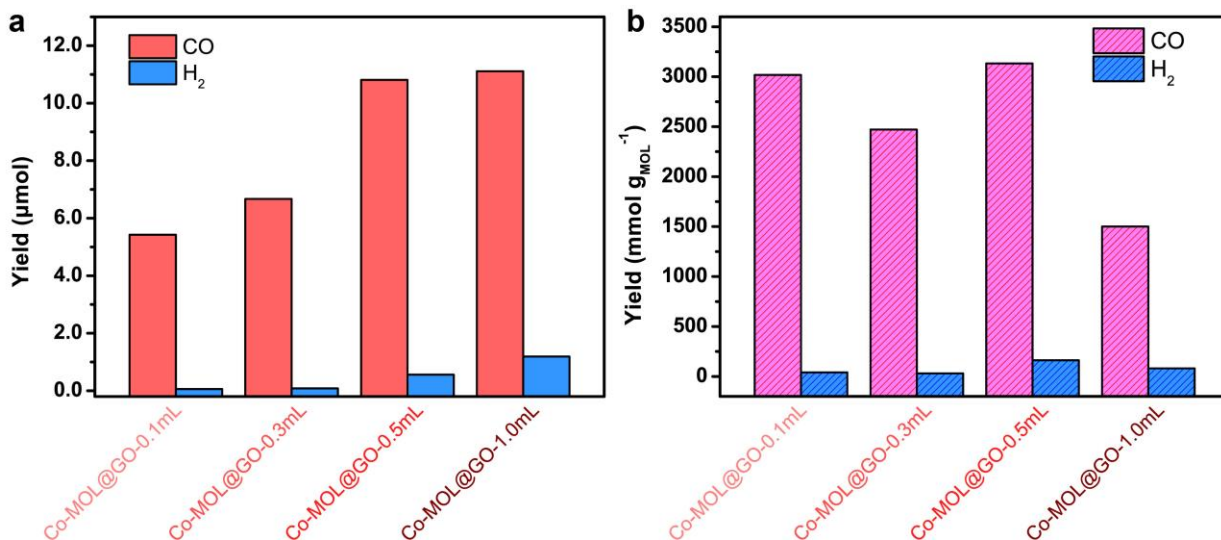

**Supplementary Figure 12 | Photocatalysis with loading-varied Co-MOL@GO samples.** Comparisons of CO and H<sub>2</sub> **a** yields in μmol or **b** yields in mmol g<sub>MOL</sub><sup>-1</sup>, with 10 mg L<sup>-1</sup> Co-MOL@GO samples prepared with 0.1, 0.3, 0.5 or 1.0 mL aqueous solution of CoCl<sub>2</sub> · 6H<sub>2</sub>O (0.1 M). Other conditions: 0.4 mM RuPS and 0.3 M TEOA in 5 mL CO<sub>2</sub>-saturated CH<sub>3</sub>CN/H<sub>2</sub>O (v:v = 4:1) solution. With the comprehensive estimation of CO yield, Co-MOL@GO-0.5mL was chosen as the optimal catalyst.

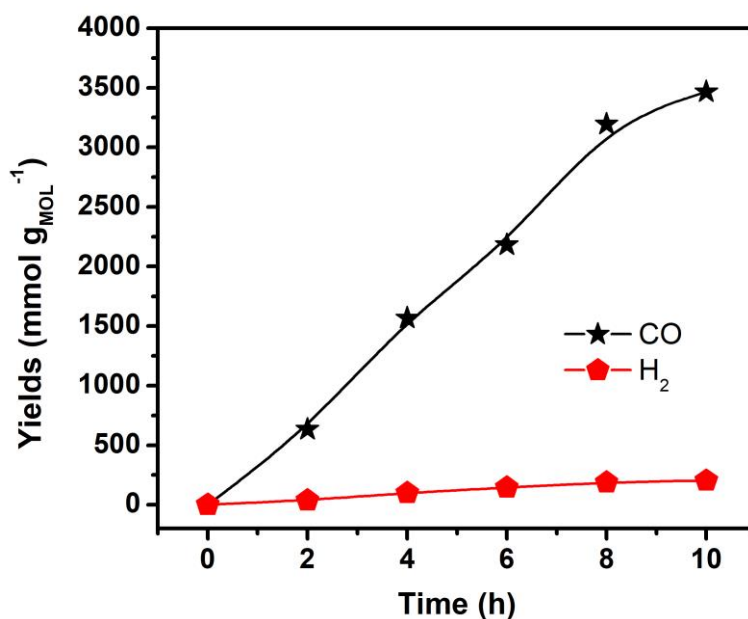

**Supplementary Figure 13 | Photocatalysis.** Time profiles of CO (black star) and H<sub>2</sub> (red pentagon) evolution catalyzed by 10 mg L<sup>-1</sup> Co-MOL@GO in a five-times scaling-up reaction system.

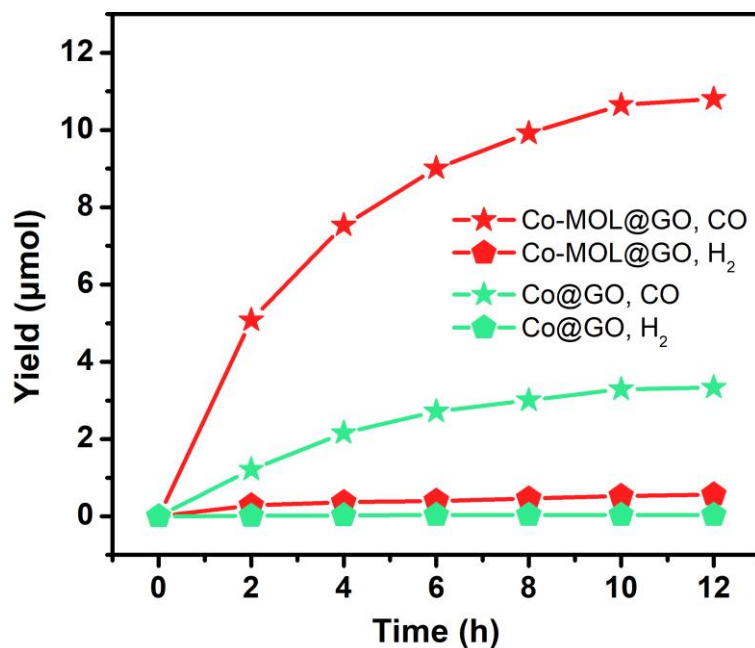

**Supplementary Figure 14 | Photocatalysis.** Time profiles of CO (star) and H<sub>2</sub> (pentagon) evolution catalyzed by 10 mg L<sup>-1</sup> Co-MOL@GO (red) and Co@GO (green) under irradiation in the presence of 0.4 mM RuPS and 0.3 M TEOA in 5 mL CO<sub>2</sub>-saturated CH<sub>3</sub>CN/H<sub>2</sub>O (v:v = 4:1) solution.

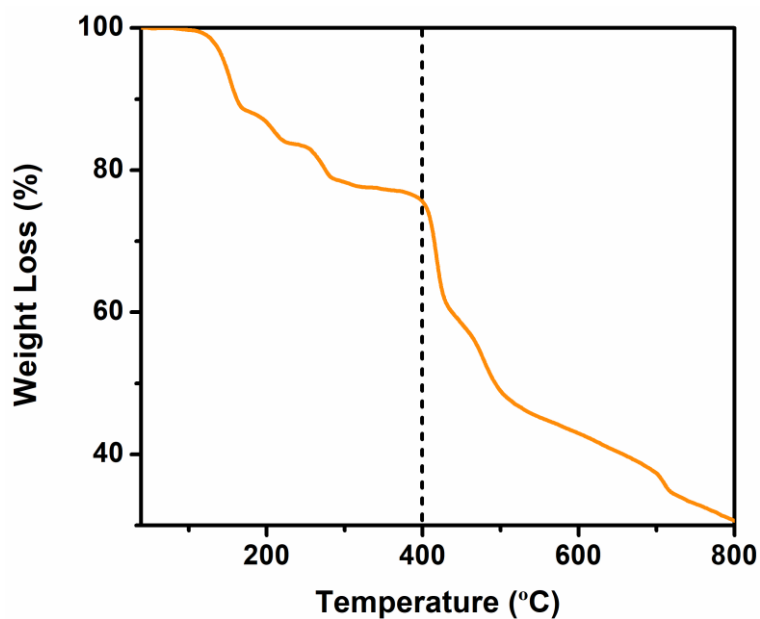

**Supplementary Figure 15 | TGA.** TGA curve of Co-MOF.

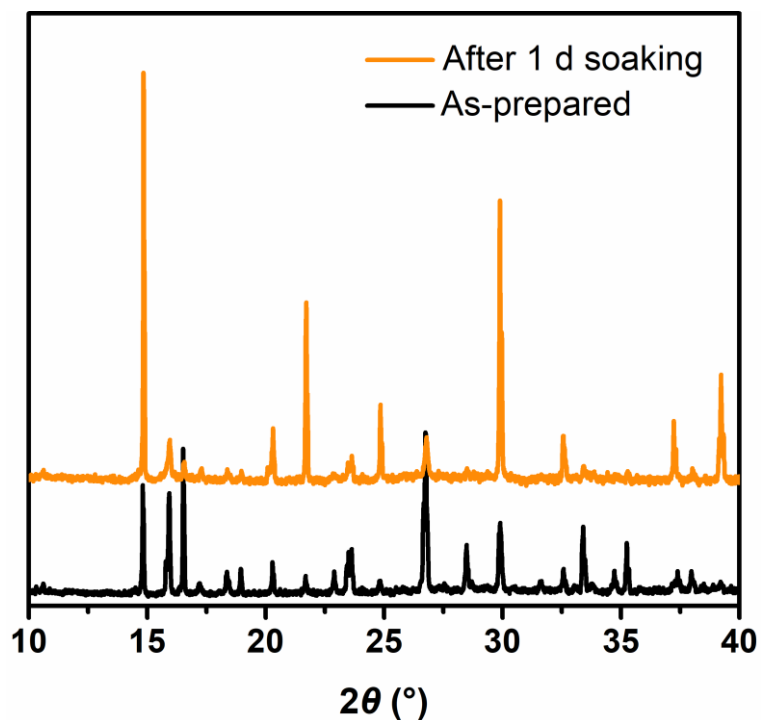

**Supplementary Figure 16 | PXRD.** PXRD patterns of as-prepared Co-MOF sample (orange) and that soaked in a  $\text{CO}_2$ -saturated  $\text{CH}_3\text{CN}/\text{H}_2\text{O}$  ( $v:v = 4:1$ ) solution containing 0.3 M TEOA for 1 d (black).

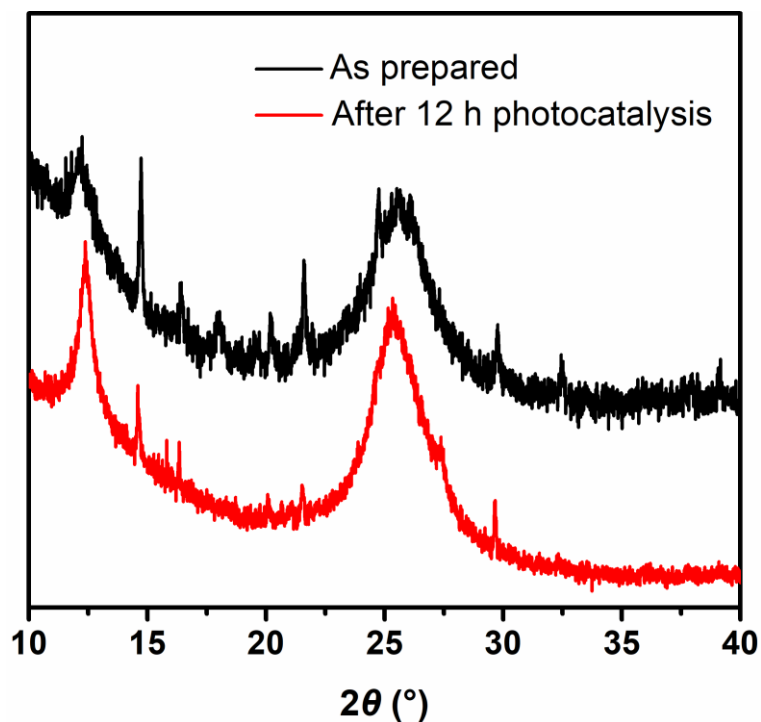

**Supplementary Figure 17 | PXRD.** PXRD patterns of as-prepared Co-MOL@GO (black) and the one experienced 12 h photo-reaction in a  $\text{CO}_2$ -saturated  $\text{CH}_3\text{CN}/\text{H}_2\text{O}$  ( $v:v = 4:1$ ) solution containing 0.3 M TEOA (red).

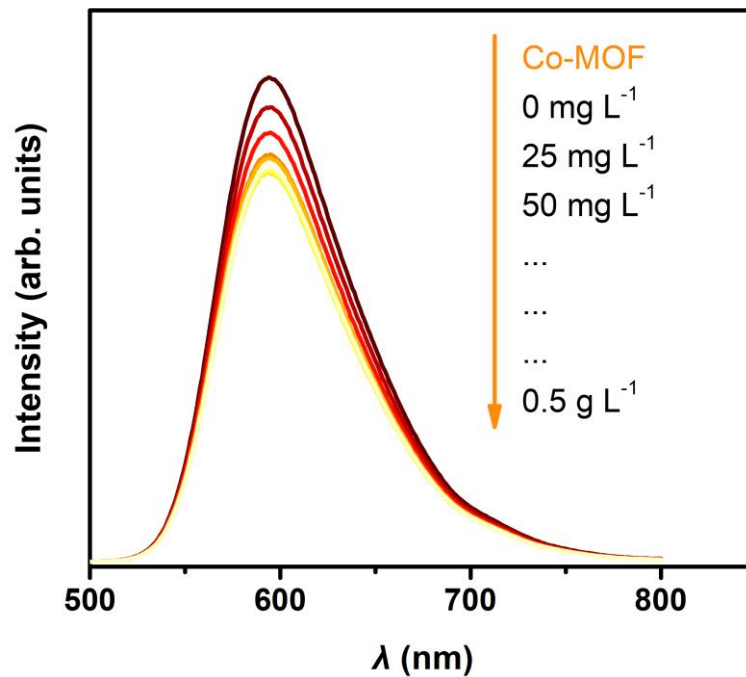

**Supplementary Figure 18 | Quenching experiments.** Fluorescence spectra of a CH<sub>3</sub>CN/H<sub>2</sub>O (*v:v* = 4:1) solution containing 0.4 mM RuPS in the presence of 0~0.5 g L<sup>-1</sup> of Co-MOF.

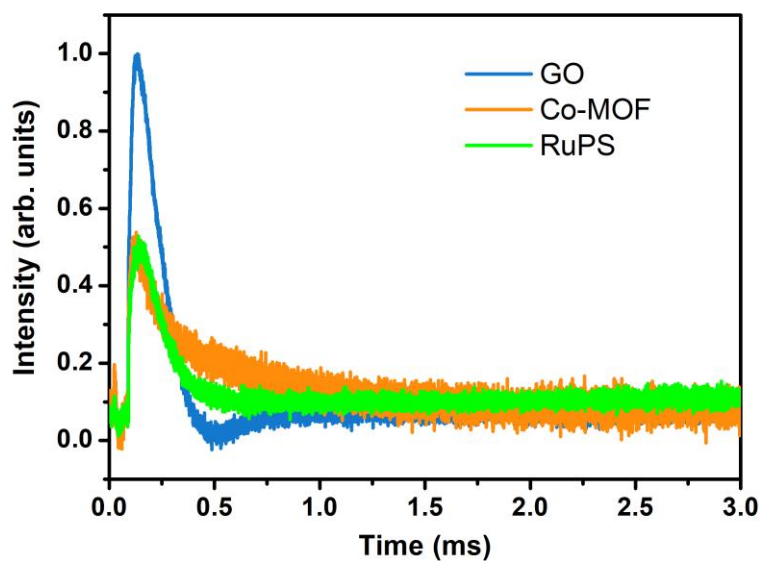

**Supplementary Figure 19 | TPV.** TPV curves of dry GO (blue), Co-MOF (orange) and RuPS (green) powders in air.



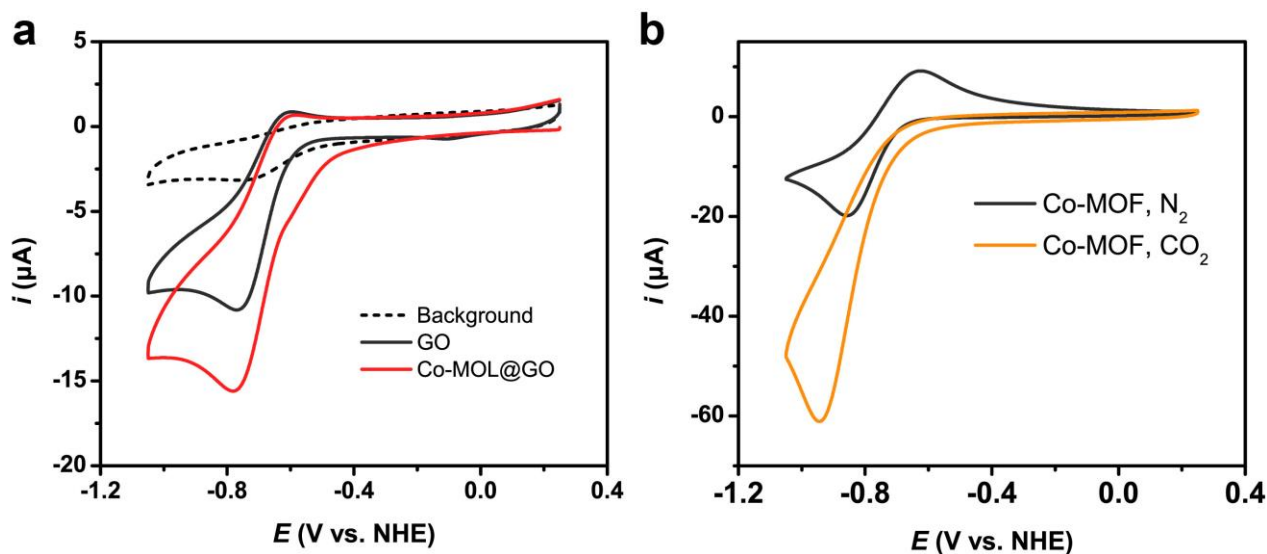

**Supplementary Figure 20 | Cyclic voltammetry.** **a** CVs of Co-MOL@GO (red) or GO (black solid line) under  $N_2$ , **b** CVs of Co-MOF under  $N_2$  (black) or  $CO_2$  (orange) on a glass carbon disk electrode (3 mm diameter) in  $CH_3CN/H_2O$  ( $v:v = 4:1$ ) solution at  $0.1 \text{ V s}^{-1}$  scan rate. The CV obtained with bare glass carbon disk electrode is shown for comparison (black dashed line in Supplementary Figure 20a).

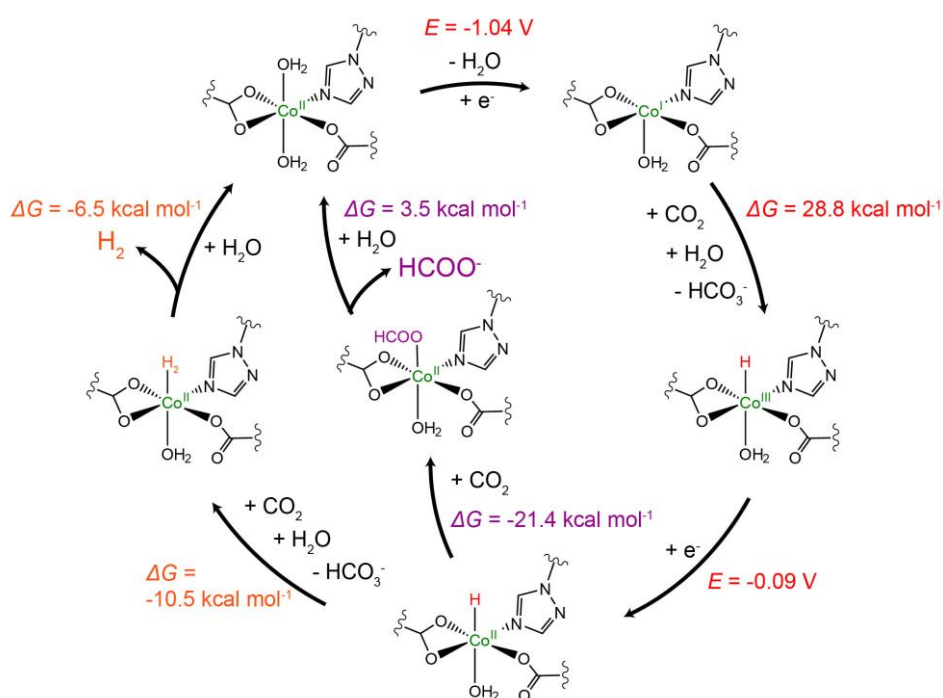

**Supplementary Figure 21 | Calculated mechanism of Co-MOF.** Calculated mechanism with the molecular unit of Co-MOF for catalytic proton reduction to  $H_2$  and  $CO_2$  reduction to formate, showing the calculated redox potentials and free energy changes.

## Supplementary Tables

**Supplementary Table 1 | Crystallographic data.** Crystallographic data of Co-MOF, Cd-MOF and Zn-MOF.

| Complex                                                 | Co-MOF                                                                                     | Cd-MOF                                                            | Zn-MOF                                                           |
|---------------------------------------------------------|--------------------------------------------------------------------------------------------|-------------------------------------------------------------------|------------------------------------------------------------------|
| Formula                                                 | CoC <sub>10</sub> H <sub>9</sub> N <sub>3</sub> O <sub>6.5</sub>                           | CdC <sub>10</sub> H <sub>10</sub> N <sub>3</sub> O <sub>6.5</sub> | ZnC <sub>10</sub> H <sub>8</sub> N <sub>3</sub> O <sub>5.5</sub> |
| CCDC number                                             | 1965944                                                                                    | 2047069                                                           | 2047070                                                          |
| Formula weight                                          | 335.14                                                                                     | 388.61                                                            | 323.56                                                           |
| Crystal system                                          | monoclinic                                                                                 | monoclinic                                                        | orthorhombic                                                     |
| Space group                                             | <i>C2/c</i>                                                                                | <i>C2/c</i>                                                       | <i>Pbcn</i>                                                      |
| <i>Z</i>                                                | 8                                                                                          | 8                                                                 | 8                                                                |
| <i>a</i> / Å                                            | 19.6624(4)                                                                                 | 19.9580(5)                                                        | 15.5913(3)                                                       |
| <i>b</i> / Å                                            | 10.7223(2)                                                                                 | 10.9485(3)                                                        | 6.7209(2)                                                        |
| <i>c</i> / Å                                            | 13.4748(3)                                                                                 | 13.4505(3)                                                        | 21.1187(5)                                                       |
| $\beta$ / °                                             | 124.166(2)                                                                                 | 122.541(2)                                                        | 90.00                                                            |
| <i>V</i> / Å <sup>3</sup>                               | 2350.55(8)                                                                                 | 2477.66(11)                                                       | 2212.98(9)                                                       |
| $\rho_{calcd}$ / g m <sup>-3</sup>                      | 1.894                                                                                      | 2.084                                                             | 1.942                                                            |
| <i>M</i> / mm <sup>-1</sup>                             | 11.844                                                                                     | 14.498                                                            | 3.393                                                            |
| 2 $\theta$ range collected / °                          | 4.94 / 79.34                                                                               | 9.64 / 134.14                                                     | 8.38 / 158.88                                                    |
| Reflns collected/Indep.                                 | 8434 / 2484                                                                                | 7038 / 2208                                                       | 7971 / 2374                                                      |
| <i>R</i> <sub>int</sub>                                 | 0.0339                                                                                     | 0.1073                                                            | 0.0392                                                           |
| <i>F</i> (000)                                          | 1360.0                                                                                     | 1528.0                                                            | 1304.0                                                           |
| GOF on <i>F</i> <sup>2</sup>                            | 1.071                                                                                      | 1.180                                                             | 1.069                                                            |
| Final <i>R</i> indices [ <i>I</i> > 2sigma( <i>I</i> )] | <sup>a</sup> <i>R</i> <sub>1</sub> = 0.0427, <sup>b</sup> w <i>R</i> <sub>2</sub> = 0.1244 | <i>R</i> <sub>1</sub> = 0.0950, w <i>R</i> <sub>2</sub> = 0.2371  | <i>R</i> <sub>1</sub> = 0.0448, w <i>R</i> <sub>2</sub> = 0.1340 |
| <i>R</i> indices (all data)                             | <i>R</i> <sub>1</sub> = 0.0449, w <i>R</i> <sub>2</sub> = 0.1261                           | <i>R</i> <sub>1</sub> = 0.0970, w <i>R</i> <sub>2</sub> = 0.2390  | <i>R</i> <sub>1</sub> = 0.0477, w <i>R</i> <sub>2</sub> = 0.1377 |

$$^a R_I = \sum ||F_0| - |F_c|| / \sum F_0. \quad ^b wR_2 = \{[\sum (F_0^2 - F_c^2) / \sum w (F_0^2)^2]\}^{1/2}$$

**Supplementary Table 2** | Co amounts of Co-MOL@GO determined by ICP-MS and the photocatalytic performance.

| Entry | $V_{\text{Co}}$<br>(mL) <sup>[a]</sup> | Sample    | Co contents<br>(w%) | Co-MOL<br>contents (w%) | CO/H <sub>2</sub> yields<br>( $\mu\text{mol}$ ) <sup>[b]</sup> | CO/H <sub>2</sub> yields<br>( $\text{mol g}^{-1}_{\text{MOL}}$ ) <sup>[b]</sup> |
|-------|----------------------------------------|-----------|---------------------|-------------------------|----------------------------------------------------------------|---------------------------------------------------------------------------------|
| 1     | 0.1                                    | Co-MOL@GO | 0.51 $\pm$ 0.01     | 2.93                    | 4.42/0.059                                                     | 3017/40.3                                                                       |
| 2     | 0.3                                    | Co-MOL@GO | 0.94 $\pm$ 0.02     | 5.40                    | 6.67/0.082                                                     | 2471/30.2                                                                       |
| 3     | 0.5                                    | Co-MOL@GO | 1.20 $\pm$ 0.02     | 6.90                    | 10.81/0.56                                                     | 3133/162                                                                        |
| 4     | 1.0                                    | Co-MOL@GO | 2.41 $\pm$ 0.06     | 14.8                    | 11.11/1.19                                                     | 1501/80.4                                                                       |

<sup>[a]</sup> $V_{\text{Co}}$  is the added volume of 1.0 M CoCl<sub>2</sub> solution.

<sup>[b]</sup>10 mg L<sup>-1</sup> Co-MOL@GO was used for 10 h photocatalysis.

**Supplementary Table 3** | Photocatalytic performances of MOF catalysts for CO<sub>2</sub> reduction to CO with Ru-based PSs.

| Catalysts (mass)                 | Medium                                                                                     | PS (mass)                                                          | Products (μmol)                                                          | Maximum CO Yield (mmol g <sup>-1</sup> ) | CO (%)   | Ref       |
|----------------------------------|--------------------------------------------------------------------------------------------|--------------------------------------------------------------------|--------------------------------------------------------------------------|------------------------------------------|----------|-----------|
| Co-MOL@GO (0.05 mg)              | CH <sub>3</sub> CN (4.0 mL)<br>H <sub>2</sub> O (1.0 mL)                                   | [Ru(phen) <sub>3</sub> ](PF <sub>6</sub> ) <sub>2</sub> (2.0 mg)   | CO: 10.81<br>H <sub>2</sub> : 0.56                                       | 216.1 (3133 based on MOL)                | 95       | This Work |
| Co-MOF (0.05 mg)                 | TEOA (0.2 mL)                                                                              |                                                                    | CO: 4.58<br>H <sub>2</sub> : 1.0                                         | 91.5                                     | 82       |           |
| 2D-Ni <sub>2</sub> TCPE (5 mg)   | CH <sub>3</sub> CN (48 mL)<br>H <sub>2</sub> O (12 mL)<br>TEOA (6 mL)                      | [Ru(bpy) <sub>3</sub> ]Cl <sub>2</sub> 6H <sub>2</sub> O (37.5 mg) | CO: 100<br>H <sub>2</sub> : 1.03                                         | CO: 20<br>H <sub>2</sub> : 0.2           | 97.2     | 1         |
| MOF-Ni (5 mg)                    | CH <sub>3</sub> CN (28 mL)<br>H <sub>2</sub> O (2 mL)<br>tri-isopropanolamine (TIPA; 2 mL) | [Ru(bpy) <sub>3</sub> ]Cl <sub>2</sub> 6H <sub>2</sub> O (7.5 mg)  | CO: 22.3<br>H <sub>2</sub> : 0.5                                         | CO: 1.86<br>H <sub>2</sub> : 0.04        | 97.7     | 2         |
| CN-250-Fe <sub>2</sub> Mn (5 mg) | CH <sub>3</sub> CN (45 mL)<br>H <sub>2</sub> O (3 mL)<br>TIPA (10 mL)                      | [Ru(bpy) <sub>3</sub> ]Cl <sub>2</sub> 6H <sub>2</sub> O (60 mg)   | CO: 430<br>CO: 94.4                                                      | 86.04                                    | 82       | 3         |
| MAF-X271-OH (1.77 mg)            | CH <sub>3</sub> CN (4.0 mL)<br>H <sub>2</sub> O (1.0 mL)<br>TEOA (0.2 mL)                  | [Ru(bpy) <sub>3</sub> ]Cl <sub>2</sub> 6H <sub>2</sub> O (~1.5 mg) | CO: 45<br>H <sub>2</sub> : 0.8                                           | 25.4                                     | 98       | 4         |
| Zr-DMBD-Co (0.1 mg)              | CH <sub>3</sub> CN (4.0 mL)<br>H <sub>2</sub> O (1.0 mL)<br>TEOA (0.2 mL)                  | [Ru(phen) <sub>3</sub> ](PF <sub>6</sub> ) <sub>2</sub> (2.0 mg)   | CO: 3.33<br>H <sub>2</sub> : 0.041                                       | 33.3                                     | 99       | 5         |
| Co-ZIF-9 (0.2 mg)<br>(3 mg)      | CH <sub>3</sub> CN (4.0 mL)<br>H <sub>2</sub> O (1.0 mL)<br>TEOA (1.0 mL)                  | [Ru(bpy) <sub>3</sub> ]Cl <sub>2</sub> 6H <sub>2</sub> O (~7.5 mg) | CO: 41.8<br>H <sub>2</sub> : 30.29<br>CO: 51.6<br>H <sub>2</sub> : 47.63 | 209<br>17.2                              | 58<br>52 | 6         |
| ZIF-67_3                         | CH <sub>3</sub> CN (4.0 mL)                                                                | [Ru(bpy) <sub>3</sub> ]Cl <sub>2</sub> 6H <sub>2</sub> O           | CO: 16                                                                   | 1.6                                      | 63       | 7         |



|                                                                                      |                                                                           |                                                                      |                                                                      |             |          |    |
|--------------------------------------------------------------------------------------|---------------------------------------------------------------------------|----------------------------------------------------------------------|----------------------------------------------------------------------|-------------|----------|----|
| (10 mg)                                                                              | H <sub>2</sub> O (1.0 mL)<br>TEOA (1.0 mL)                                | O<br>(8 mg)                                                          | H <sub>2</sub> : 9                                                   |             |          |    |
| Ni(TPA/TEG)<br>(3 mg)                                                                | CH <sub>3</sub> CN (8.0 mL)<br>H <sub>2</sub> O (2.0 mL)<br>TEOA (2.0 mL) | [Ru(bpy) <sub>3</sub> ]Cl <sub>2</sub> 6H <sub>2</sub> O<br>(1.5 g)  | CO: 140<br>H <sub>2</sub> : 7.49                                     | 47          | 99       | 8  |
| Ni <sub>3</sub> (HITP) <sub>2</sub><br>(2 mg)<br>At 4 C °, 80 kPa<br>CO <sub>2</sub> | CH <sub>3</sub> CN (8.0 mL)<br>H <sub>2</sub> O (2.0 mL)<br>TEOA (4.0 mL) | [Ru(bpy) <sub>3</sub> ]Cl <sub>2</sub> 6H <sub>2</sub> O<br>(80 mg)  | CO: 207<br>H <sub>2</sub> : 7.49                                     | 103.5       | 97       | 9  |
| Ni MOLs<br>(1 mg)                                                                    | CH <sub>3</sub> CN (3.0 mL)<br>H <sub>2</sub> O (2.0 mL)<br>TEOA (1.0 mL) | [Ru(bpy) <sub>3</sub> ]Cl <sub>2</sub> 6H <sub>2</sub> O<br>(7.5 mg) | CO: 25<br>H <sub>2</sub> : 0.56                                      | 25          | 98       | 10 |
| Co ZIF-8<br>(1.0 mg)<br>(0.1 mg)                                                     | CH <sub>3</sub> CN (3.0 mL)<br>H <sub>2</sub> O (2.0 mL)<br>TEOA (1.0 mL) | [Ru(bpy) <sub>3</sub> ]Cl <sub>2</sub> 6H <sub>2</sub> O<br>(8 mg)   | CO: 26.6<br>H <sub>2</sub> : 14.8<br>CO: 37.4<br>H <sub>2</sub> : 13 | 26.6<br>374 | 67<br>74 | 11 |
| Zn ZIF-8<br>(1.0 mg)                                                                 | CH <sub>3</sub> CN (3.0 mL)<br>H <sub>2</sub> O (2.0 mL)<br>TEOA (1.0 mL) | [Ru(bpy) <sub>3</sub> ]Cl <sub>2</sub> 6H <sub>2</sub> O<br>(8 mg)   | CO: 1.8<br>H <sub>2</sub> : 2.0                                      | 18          | 47       | 11 |
| Cu HKUST-1<br>(1 mg)                                                                 | CH <sub>3</sub> CN (3.0 mL)<br>H <sub>2</sub> O (2.0 mL)<br>TEOA (1.0 mL) | [Ru(bpy) <sub>3</sub> ]Cl <sub>2</sub> 6H <sub>2</sub> O<br>(8 mg)   | CO: 1.5<br>H <sub>2</sub> : 1.91                                     | 1.5         | 44       | 11 |
| Zr-UIO-66-NH <sub>2</sub><br>(1 mg)                                                  | CH <sub>3</sub> CN (3.0 mL)<br>H <sub>2</sub> O (2.0 mL)<br>TEOA (1.0 mL) | [Ru(bpy) <sub>3</sub> ]Cl <sub>2</sub> 6H <sub>2</sub> O<br>(8 mg)   | CO: 0.9<br>H <sub>2</sub> : 1.24                                     | 0.9         | 43       | 11 |
| Fe-MIL-101-NH <sub>2</sub><br>(1 mg)                                                 | CH <sub>3</sub> CN (3.0 mL)<br>H <sub>2</sub> O (2.0 mL)<br>TEOA (1.0 mL) | [Ru(bpy) <sub>3</sub> ]Cl <sub>2</sub> 6H <sub>2</sub> O<br>(8 mg)   | CO: 4.7<br>H <sub>2</sub> : 2.1                                      | 4.7         | 69       | 11 |

**Supplementary Table 4** | Relative free energy in kcal mol<sup>-1</sup> for intermediates at different spin states.<sup>a</sup>

| Entry | Intermediates                     | singlet | doublet | triplet | quartet |
|-------|-----------------------------------|---------|---------|---------|---------|
| 1     | Co <sup>II</sup>                  | N.A.    | 23.32   | N.A.    | 0       |
| 2     | Co <sup>I</sup>                   | 22.62   | N.A.    | 0       | N.A.    |
| 3     | Co <sup>II</sup> -CO <sub>2</sub> | N.A.    | 0.08    | N.A.    | 0       |
| 4     | Co <sup>II</sup> -COOH            | N.A.    | 0       | N.A.    | 0.05    |
| 5     | Co <sup>II</sup> -CO              | N.A.    | 11.28   | N.A.    | 0       |
| 6     | Co <sup>III</sup> -H              | 7.85    | N.A.    | 0       | N.A.    |
| 7     | Co <sup>II</sup> -H               | N.A.    | 1.13    | N.A.    | 0       |
| 8     | Co <sup>II</sup> -H <sub>2</sub>  | N.A.    | 20.97   | N.A.    | 0       |
| 9     | Co <sup>II</sup> -HCOO            | N.A.    | 18.30   | N.A.    | 0       |

<sup>[a]</sup> For each lowest energy spin state, the free energy is set as reference point, 0 kcal mol<sup>-1</sup>.

**Supplementary Table 5** | Calculated Co<sup>II/I</sup> reduction potentials by different functional with def2SVP basis set.

| Entry | Method/Functional | Co <sup>II/I</sup> reduction potential (V vs. NHE) |
|-------|-------------------|----------------------------------------------------|
| 1     | Measured value    | -0.94                                              |
| 2     | B3P86             | -1.04                                              |
| 3     | B3P86-D3          | -1.16                                              |
| 4     | M06-D3-           | -1.60                                              |
| 5     | M06-L-D3          | -1.42                                              |
| 7     | M06               | -1.57                                              |
| 8     | M06-L             | -1.41                                              |
| 9     | B3LYP             | -1.56                                              |
| 10    | B3LYP-D3          | -1.68                                              |

## Supplementary References

1. Zheng, H. L., *et al.* Photochemical in situ exfoliation of metal-organic frameworks for enhanced visible-light-driven CO<sub>2</sub> reduction. *Angew. Chem. Int. Ed.* DOI: 10.1002/anie.202012019 (2020), .
2. Wang, X.-K., *et al.* Monometallic catalytic models hosted in stable metal-organic frameworks for tunable CO<sub>2</sub> photoreduction. *ACS Catal.* 1726-1732 (2019).
3. Dong, H., *et al.* Regulation of metal ions in smart metal-cluster nodes of metal-organic frameworks with open metal sites for improved photocatalytic CO<sub>2</sub> reduction reaction. *Appl. Catal. B-Environ* DOI: 10.1016/j.apcatb.2020.119173 (2020).
4. Wang, Y., Huang, N. Y., Shen, J. Q., Liao, P. Q., Chen, X. M. & Zhang, J. P. Hydroxide ligands cooperate with catalytic centers in metal-organic frameworks for efficient photocatalytic CO<sub>2</sub> reduction. *J. Am. Chem. Soc.* **140**, 38-41 (2018).
5. Liu, D. C., *et al.* Anchoring Co(II) ions into a thiol-laced metal-organic framework for efficient visible-light-driven conversion of CO<sub>2</sub> into CO. *ChemSusChem* **12**, 2166-2170 (2019).
6. Wang, S., Yao, W., Lin, J., Ding, Z. & Wang, X. Cobalt imidazolate metal-organic frameworks photosplit CO<sub>2</sub> under mild reaction conditions. *Angew. Chem. Int. Ed.* **53**, 1034-1038 (2014).
7. Wang, M., *et al.* Metal-organic frameworks (ZIF-67) as efficient cocatalysts for photocatalytic reduction of CO<sub>2</sub>: The role of the morphology effect. *J. Mater. Chem. A* **6**, 4768-4775 (2018).
8. Niu, K., *et al.* A spongy nickel-organic CO<sub>2</sub> reduction photocatalyst for nearly 100% selective CO production. *Sci. Adv.* **3**, e1700921 (2017).
9. Zhu, W., *et al.* Selective reduction of CO<sub>2</sub> by conductive MOF nanosheets as an efficient co-catalyst under visible light illumination. *Appl. Catal. B-Environ* **238**, 339-345 (2018).
10. Han, B., *et al.* Nickel metal-organic framework monolayers for photoreduction of diluted CO<sub>2</sub>: Metal-node-dependent activity and selectivity. *Angew. Chem. Int. Ed.* **57**, 16811-16815 (2018).
11. Qin, J., Wang, S. & Wang, X. Visible-light reduction CO<sub>2</sub> with dodecahedral zeolitic imidazolate framework ZIF-67 as an efficient co-catalyst. *Appl. Catal. B-Environ* **209**, 476-482 (2017).
